# Supplementary material
Source: Springer Nature journal article supplement (https://www.springermedizin.de/resource/supplementary/12967_2010_671_MOESM6_ESM.pdf/9577074)

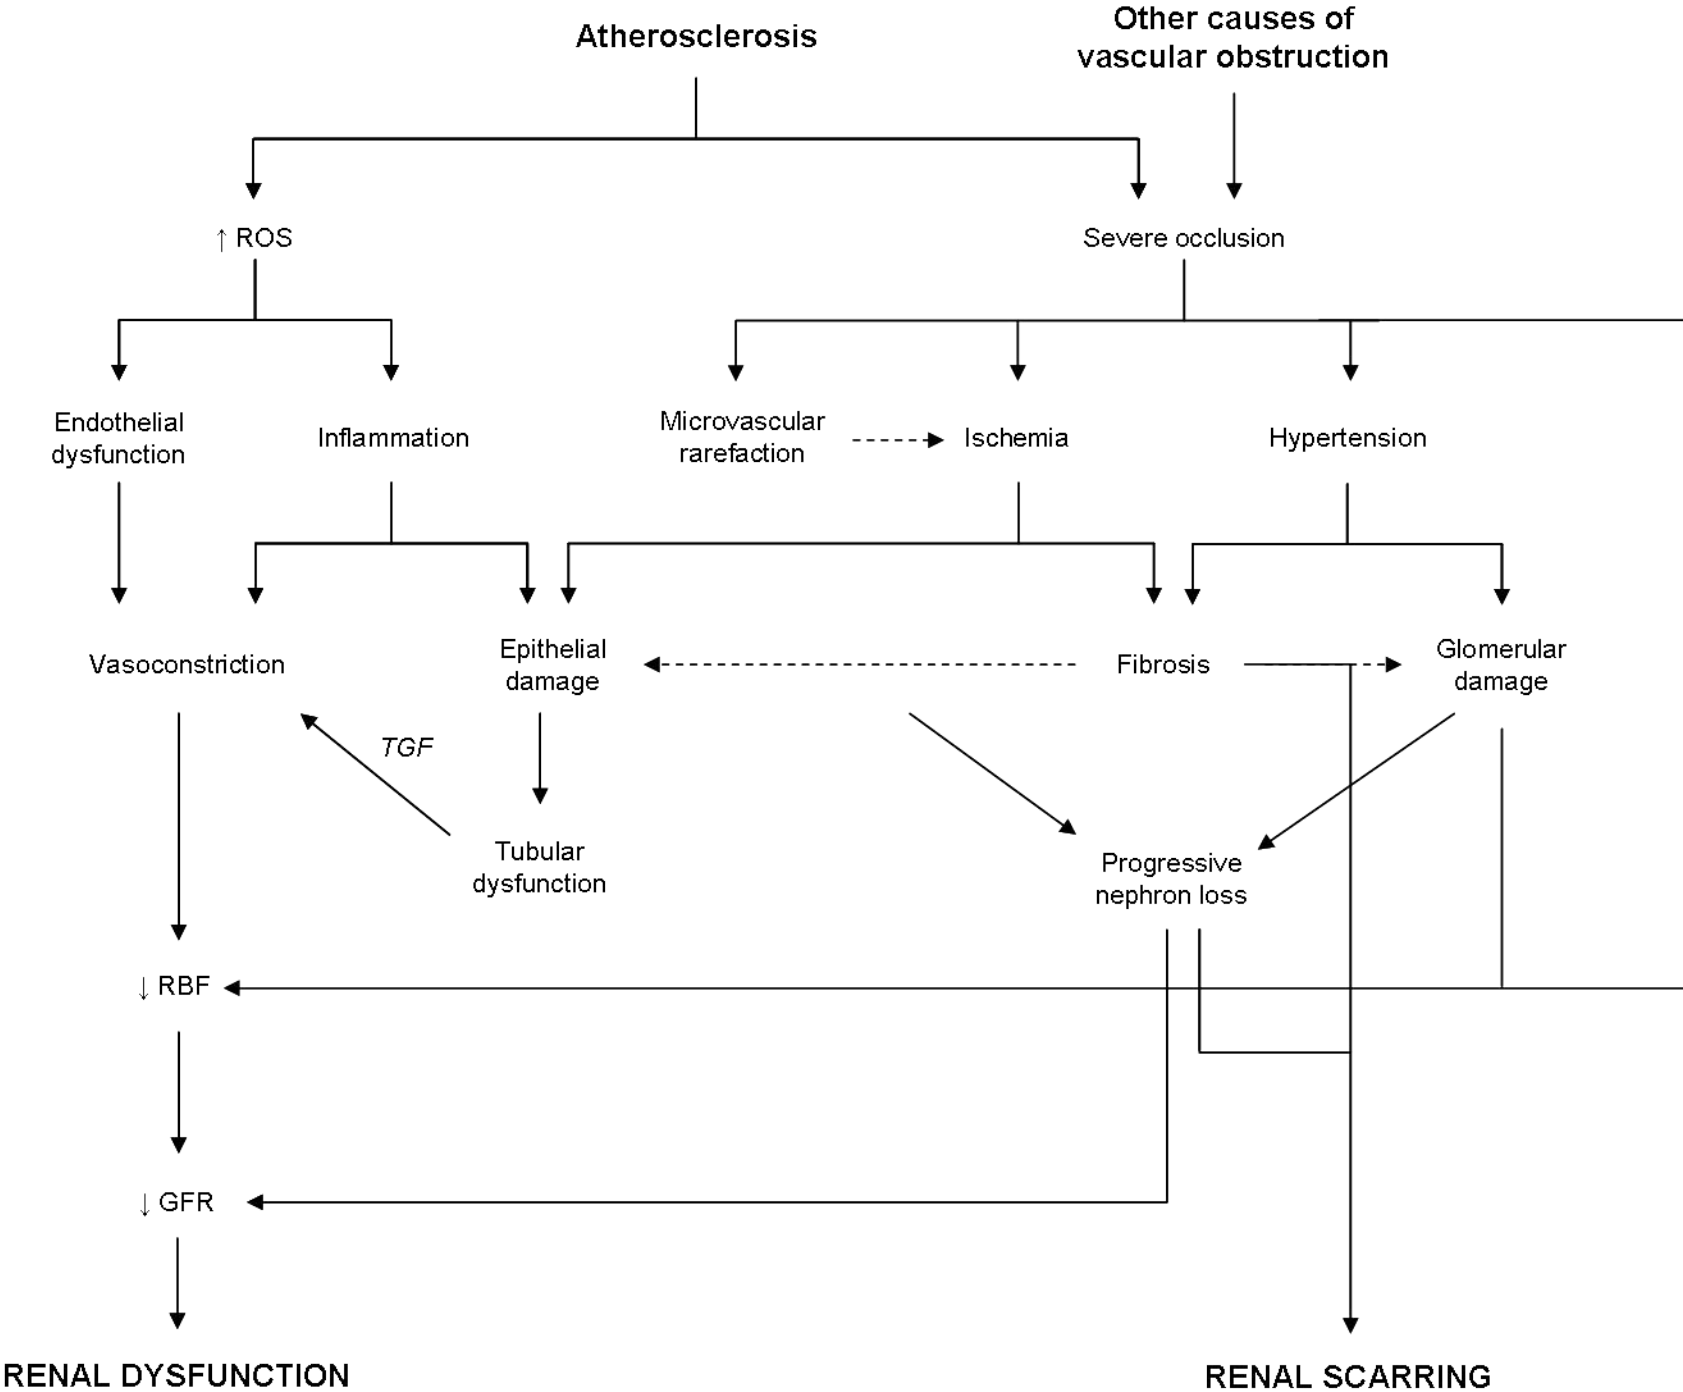

Supplement: MOESM6 [file 9577074]
